# Supplementary material for: High-performance method of carbon nanotubes modification by microwave plasma for thin composite films preparation
Source: Royal Society of Chemistry journal article supplement (doi:10.1039/c7ra04707j), 2017-01-01
Supplement: c7ra04707j1.pdf [file c7ra04707j1.pdf]

# High-performance method of carbon nanotubes modification by microwave plasma for thin composite films

## preparation

*Anna Dettlaff<sup>a</sup>, Mirosław Sawczak<sup>b</sup>, Ewa Klugmann-Radziemska<sup>a</sup>, Dariusz Czyłkowski<sup>b</sup>, Robert Miotk<sup>b</sup>, Monika Wilamowska-Zawłocka<sup>a\*</sup>*

<sup>a</sup> *Department of Chemical Apparatus and Theory of Machines, Faculty of Chemistry, Gdańsk University of Technology, Narutowicza 11/12, 80-233 Gdańsk, Poland*

<sup>b</sup> *Institute of Fluid Flow Machinery, Polish Academy of Sciences,*

*Fiszera 14, 80-231 Gdańsk, Poland*

*\*E-mail: monika.wilamowska@pg.gda.pl*

## Supplementary information

**Table 1s†.** Conditions of nitrogen plasma treatment of carbon nanotubes.

| Sample name:         | A             | B                                                  | C                                                | D                                                 | E                                                 | F                                    | G                    | H     | I                    | J      | K                    |
|----------------------|---------------|----------------------------------------------------|--------------------------------------------------|---------------------------------------------------|---------------------------------------------------|--------------------------------------|----------------------|-------|----------------------|--------|----------------------|
| Modification method: | Pristine CNTs | N-CNTs modified in standard RF plasma (in chamber) |                                                  |                                                   |                                                   | (p)N-CNTs modified in flow MW plasma |                      |       |                      |        |                      |
| Plasma conditions:   | -             | 50 W,<br><i>t</i> =2 min,<br><i>f</i> =13.56 MHz   | 50 W,<br><i>t</i> =5 min,<br><i>f</i> =13.56 MHz | 50 W,<br><i>t</i> =20 min,<br><i>f</i> =13.56 MHz | 50 W,<br><i>t</i> =60 min,<br><i>f</i> =13.56 MHz | 150 W                                | 150 W                | 250 W | 250 W                | 1000 W | 1000 W               |
| Dispersed in:        | water         | water                                              | water                                            | water                                             | water                                             | water                                | 0.1 M PSSNa in water | water | 0.1 M PSSNa in water | water  | 0.1 M PSSNa in water |

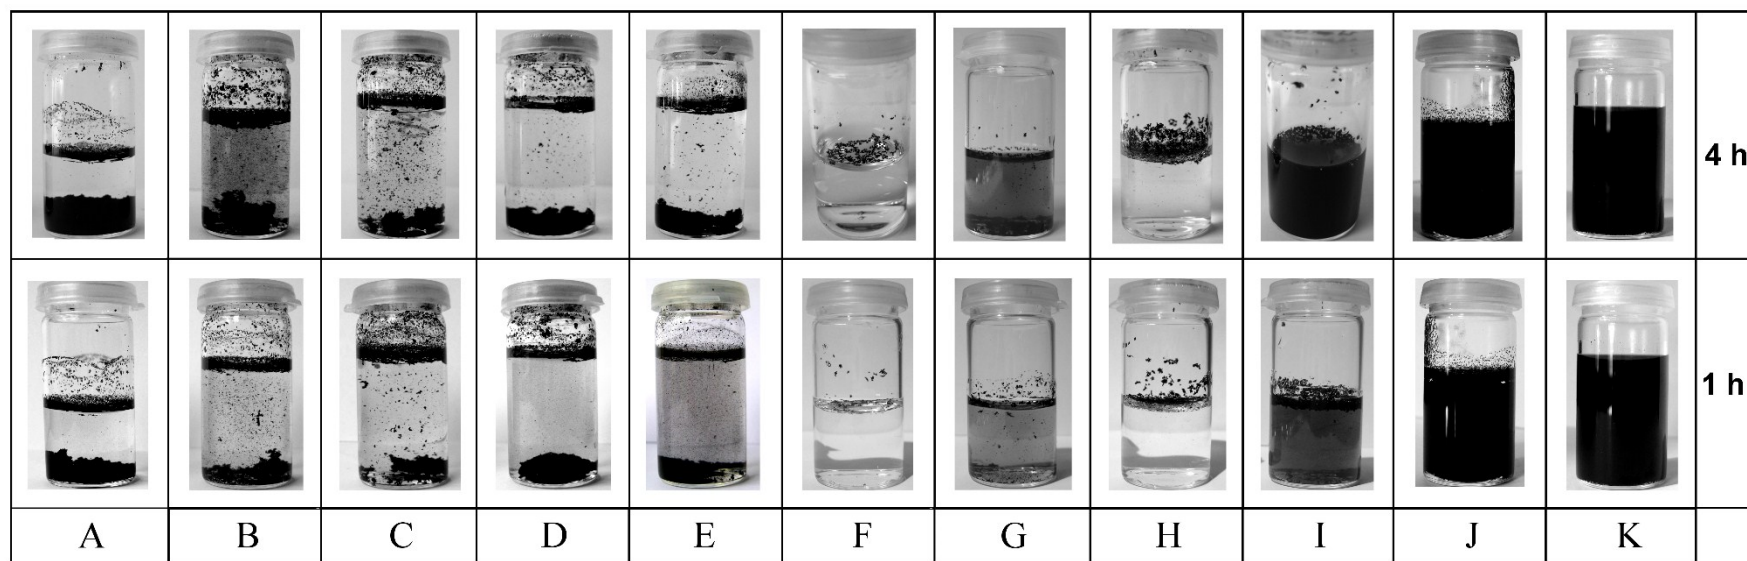

**Fig. 1s†.** Aqueous suspensions of pristine and modified carbon nanotubes after 1 h and 4 h of sonication, respectively. Samples' names A-K according to Table 1s†.
